# Supplementary material for: Rare Copy Number Variations in a Chinese Cohort of Autism Spectrum Disorder
Source: Front Genet. 2018 Dec 18;9:665. doi: 10.3389/fgene.2018.00665 (PMC6305546; doi:10.3389/fgene.2018.00665)
Supplement: Supplementary file 3 [file Table_3.xlsx]

## Sheet: Sheet1
Table S3. LoF-intolerant genes intersected by potentially disruptive gain events in the ASD cohort.
Gene	Full Name	CNVs intersect	Size(bp)	Type	DGV freq	Sample ID	CARS severity
RIMS2	regulating synaptic membrane exocytosis 2	chr8:104218356-104552138	333782	Dup	0	ASD024	Severe
EIF4A2	eukaryotic translation initiation factor 4A2	chr3:186503385-186680644	177259	Dup	0.000169	ASD342	Severe
EIF4A2	eukaryotic translation initiation factor 4A2	chr3:186503385-186680644	177259	Dup	0.000169	ASD446	Severe
FXR1	FMR1 autosomal homolog 1	chr3:180025589-180655097	629508	Dup	0	ASD003	Severe
ANKFY1	ankyrin repeat and FYVE domain containing 1	chr17:4113674-4371970	258296	Dup	0	ASD016	Mild
GLS	glutaminase	chr2:191553123-191780798	227675	Dup	0	ASD034	Severe
CAMK1D	calcium/calmodulin dependent protein kinase ID	chr10:12835263-13158570	323307	Dup	0	ASD136	Mild
INO80D	INO80 complex subunit D	chr2:206892788-207040131	147343	Dup	0	ASD138	Mild
DNAJC6	DnaJ heat shock protein family (Hsp40) member C30	chr1:65854842-66226961	372119	Dup	0	ASD143	Mild
SSBP3	single stranded DNA binding protein 3	chr1:54846252-55338679	492427	Dup	0	ASD145	Severe
ITGB8	integrin subunit beta 8	chr7:20179531-20422580	243049	Dup	0	ASD161	Severe
USP8	ubiquitin specific peptidase 54	chr15:50624600-50740228	115628	Dup	0	ASD188	Severe
TULP4	tubby like protein 4	chr6:158505476-158759062	253586	Dup	0	ASD192	Severe
OSBPL6	oxysterol binding protein like 6	chr2:178859118-179092432	233314	Dup	0	ASD208	Mild
EPC2	enhancer of polycomb homolog 2	chr2:149408239-149625095	216856	Dup	0	ASD214	Mild
ASXL2	ASXL transcriptional regulator 2	chr2:25608164-25985771	377607	Dup	0	ASD265	Severe
PCLO	piccolo presynaptic cytomatrix protein	chr7:82346524-82480300	133776	Dup	0	ASD274	Severe
DMXL2	Dmx like 2	chr15:51708778-51882273	173495	Dup	0	ASD322	Severe
COLEC12	collectin subfamily member 12	chr18:482904-843971	361067	Dup	0.000507	ASD329	Mild
LEPR	leptin receptor	chr1:65924510-66031445	106935	Dup	0	ASD333	Mild
BCR	BCR, RhoGEF and GTPase activating protein	chr22:23444161-23652512	208351	Dup	0.000507	ASD401	Severe
ATP11B	antioxidant 1 copper chaperone	chr3:182325983-182587582	261599	Dup	0	ASD402	Severe
DOCK4	dedicator of cytokinesis 4	chr7:111112853-111609865	497012	Dup	0	ASD420	Severe
ACTR3B	ARP3 actin related protein 3 homolog B	chr7:152516253-153499951	983698	Dup	0	ASD430	Severe
SPEN	spen family transcriptional repressor	chr1:16028835-16181301	152466	Dup	0	ASD448	Mild
